# Supplementary material
Source: publisher site journal article supplement (https://static.cambridge.org/content/id/urn:cambridge.org:id:article:S0376892919000407/resource/name/S0376892919000407supp002.pdf)
Supplement: Supplementary file 1 [file S0376892919000407supp002.pdf]

## Supplementary material

**Table S.1.** Table of data obtained through the Ballotpedia and the Trust for Public Land, Landvote databases (LBI 2017; TPL 2017) on local ballot initiatives dealing with open space areas passed in the State of California, United States of America (available online).

| Measure/Proposition | County                               | Subsidiary jurisdiction                                                   | Date of passage  |
|---------------------|--------------------------------------|---------------------------------------------------------------------------|------------------|
| Measure A           | Marin                                | Novato                                                                    | 08 April 2014    |
| Measure A           | San Diego                            | Unknown                                                                   | 02 November 2004 |
| Measure A           | Sacramento                           | NA                                                                        | 02 November 2004 |
| Measure A           | Marin                                | Unknown                                                                   | 06 November 2012 |
| Measures A & C      | Sonoma                               | Sonoma County Agricultural Preservation & Open Space District             | 06 November 1990 |
| Measures A & B      | Los Angeles                          | City of Monrovia                                                          | 07 November 2000 |
| Measure AA          | San Mateo, Santa Clara, & Santa Cruz | Midpeninsula Regional Open Space District                                 | 03 June 2014     |
| Measure B           | San Mateo                            | Town of Portola Valley                                                    | 04 November 1997 |
| Measure B           | Santa Clara                          | Unknown                                                                   | 06 June 2006     |
| Measure B           | San Francisco                        | City of San Francisco                                                     | 06 November 2012 |
| Measure D           | Orange                               | City of San Juan Capistrano                                               | 10 April 1990    |
| Measure D           | Marin                                | Marinwood Community Services District                                     | 08 March 2005    |
| Measure DD          | Alameda                              | City of Oakland                                                           | 05 November 2002 |
| Measure E           | San Mateo                            | City of Belmont                                                           | 04 November 1997 |
| Measure E           | Marin                                | Marin County Open Space District                                          | 03 June 1997     |
| Measure F           | Sonoma                               | Sonoma County Agricultural Preservation & Open Space District             | 07 November 2006 |
| Measure G           | Santa Cruz                           | City of Santa Cruz                                                        | 03 November 1998 |
| Measure G           | San Mateo                            | City of San Carlos                                                        | 02 November 1999 |
| Measure G           | San Luis Obispo                      | City of San Luis Obispo                                                   | 04 November 2014 |
| Measure G           | Monterey                             | City of Pacific Grove                                                     | 06 November 1990 |
| Measure H           | San Mateo                            | Town of Portola Valley                                                    | 08 November 2005 |
| Measure HH          | Los Angeles                          | Mountains Recreation and Conservation Authority                           | 06 November 2012 |
| Measure I           | Alameda                              | City of Oakland                                                           | 06 November 1996 |
| Measure K           | Los Angeles                          | City of Los Angeles                                                       | 05 November 1996 |
| Measure K           | Alameda                              | City of Oakland                                                           | 06 November 1990 |
| Measure M           | Santa Clara                          | City of Cupertino                                                         | 05 March 2002    |
| Measure M           | Orange                               | Unknown                                                                   | 07 November 2006 |
| Measure MM          | Los Angeles                          | Mountains Recreation and Conservation Authority                           | 06 November 2012 |
| Measure O           | Yolo                                 | City of Davis                                                             | 07 November 2000 |
| Measure O           | Los Angeles                          | City of Los Angeles                                                       | 02 November 2004 |
| Measure Q           | Santa Clara                          | Santa Clara County Open Space Authority                                   | 04 November 2014 |
| Measure R           | San Mateo                            | Town of Portola Valley                                                    | 03 November 2009 |
| Measure R           | Alameda                              | City of Albany                                                            | 05 November 1996 |
| Measure S           | San Mateo                            | Town of Portola Valley                                                    | 06 November 2001 |
| Measure S           | Los Angeles                          | City of Claremont                                                         | 07 November 2006 |
| Measure T           | Santa Clara                          | City of Cupertino                                                         | 06 November 1990 |
| Measure V           | Los Angeles                          | City of Santa Monica                                                      | 07 November 2006 |
| Measure WW          | Contra Costa & Alameda               | East Bay Regional Park District                                           | 04 November 2008 |
| Measure Y           | San Luis Obispo                      | City of San Luis Obispo                                                   | 07 November 2006 |
| Measure Y           | Orange                               | City of San Juan Capistrano                                               | 08 November 2008 |
| Proposition A       | Los Angeles                          | Unknown                                                                   | 05 November 1996 |
| Proposition C       | San Francisco                        | City of San Francisco                                                     | 07 March 2000    |
| Proposition C       | San Diego                            | City of Carlsbad                                                          | 05 November 2002 |
| Resolution 2004-13  | Monterey                             | Monterey Peninsula Regional Park District                                 | 02 August 2004   |
| Proposition 218     | Los Angeles                          | Santa Monica Mountains Open Space Preservation Assessment Districts 1 & 2 | 01 August 2002   |
| Measure H           | Orange                               | City of Laguna Beach                                                      | 06 November 1990 |
| Untitled            | Los Angeles                          | City of Santa Clarita                                                     | 10 July 2007     |
| Untitled            | Los Angeles                          | City of Pasadena                                                          | 27 October 2008  |
| Measure A           | Los Angeles                          | NA                                                                        | 03 November 1992 |

## References

- Lucy Burns Institute (LBI) (2017) Ballotpedia: The Encyclopedia of American Politics. URL [https://ballotpedia.org/Local\\_Ballot\\_Measures](https://ballotpedia.org/Local_Ballot_Measures).
- The Trust For Public Land (TPL) (2017) TPL LandVote Database. URL [www.landvote.org](http://www.landvote.org).
